# Supplementary material for: Temporal Profiles and Dose-Responsiveness of Side Effects with Escitalopram and Duloxetine in Treatment-Naïve Depressed Adults
Source: PubMed Central journal article supplement (PMC6071033; doi:10.3390/bs8070064), 2018-07-17
Supplement: behavsci-08-00064-s001.pdf [file behavsci-08-00064-s001.pdf]

**Supplementary Data**

**Temporal Profiles and Dose-Responsiveness of Side Effects with Escitalopram and Duloxetine in Treatment-Naïve Depressed Adults**

Philip E. Polychroniou, Helen S. Mayberg, W. Edward Craighead, Jeffrey J. Rakofsky, Ebrahim Haroon,

Vivianne Aponte Rivera, Boadie W. Dunlop

**Table S1. Selected side effects occurring in <5% of patients**

| Side Effect            | All patients (n=211) |     | Escitalopram (n=105) |     | Duloxetine (n=106) |     | p-value | Escitalopram |      | Duloxetine  |       | p-value |
|------------------------|----------------------|-----|----------------------|-----|--------------------|-----|---------|--------------|------|-------------|-------|---------|
|                        | n                    | %   | n                    | %   | n                  | %   |         | Mean (days)  | SD   | Mean (days) | SD    |         |
| Appetite increased     | 10                   | 4.7 | 8                    | 7.6 | 2                  | 1.9 | 0.050   | 34.8         | 25.0 | 43.5        | 20.5  | 0.663   |
| Palpitations           | 8                    | 3.8 | 2                    | 1.9 | 6                  | 5.7 | 0.153   | 7.0          | 8.5  | 39.5        | 86.5  | 0.633   |
| Concentration impaired | 7                    | 3.3 | 4                    | 3.8 | 3                  | 2.8 | 0.691   | 30.5         | 19.7 | 14.3        | 13.5  | 0.281   |
| Irritability           | 6                    | 2.8 | 2                    | 1.9 | 4                  | 3.8 | 0.414   | 40.0         | 53.7 | 20.0        | 22.6  | 0.525   |
| Abnormal dreams        | 6                    | 2.8 | 3                    | 2.9 | 3                  | 2.8 | 0.991   | 13.7         | 8.5  | 26.3        | 33.5  | 0.560   |
| Tremor                 | 5                    | 2.4 | 3                    | 2.9 | 2                  | 1.9 | 0.643   | 13.3         | 18.9 | 10.5        | 13.4  | 0.869   |
| Suicidal ideation      | 3                    | 1.4 | 2                    | 1.9 | 1                  | 0.9 | 0.555   | 11.0         | 9.9  | 1.0         | ---   | 0.561   |
| Depression worsening   | 3                    | 1.4 | 1                    | 1.0 | 2                  | 1.9 | 0.566   | 8.0          | ---  | 15.0        | 18.4  | 0.808   |
| Urinary retention      | 2                    | 0.9 | 1                    | 1.0 | 1                  | 0.9 | 0.995   | 5.0          | ---  | 43.0        | ---   | ---     |
| Weight gain            | 2                    | 0.9 | 0                    | 0.0 | 2                  | 1.9 | 0.157   | ---          | ---  | 141.5       | 180.3 | ---     |
| REM sleep behavior     | 1                    | 0.5 | 0                    | 0.0 | 1                  | 0.9 | 0.318   | ---          | ---  | 3.0         | ---   | ---     |
